# Supplementary material for: Azide functionalized porphyrin based dendritic polymers forin vivomonitoring of Hg2+ions in living cells
Source: Royal Society of Chemistry journal article supplement (doi:10.1039/d0ay00769b), 2020-01-01

## Supporting Information for

# Azide Functionalized Porphyrin Based Dendritic Polymers for In Vivo Monitoring of Hg<sup>2+</sup> Ions in Living Cells

Avudaiappan G., Mariya Vibija J., Sreekumar K.\*

Department of Applied Chemistry, Cochin University of Science and Technology,  
682022, Kerala, India. Email: [ksk@cusat.ac.in](mailto:ksk@cusat.ac.in)

Kochi-

## Graphical abstract

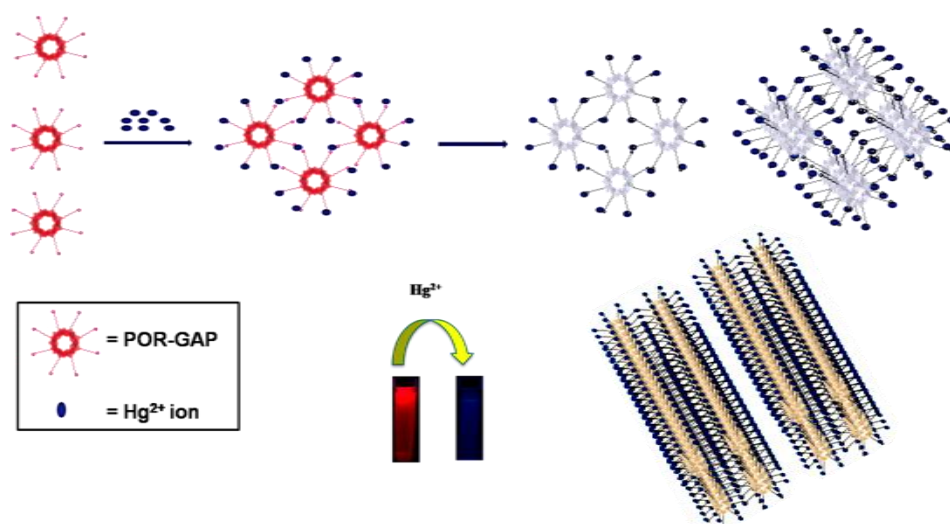

| Figure No. | Content                                  | Page No. |
|------------|------------------------------------------|----------|
| S1         | Scheme for the synthesis of POR-GAP      | 3        |
| S2         | <sup>1</sup> H NMR spectrum of POR-PECH  | 4        |
| S3         | <sup>13</sup> C NMR spectrum of POR-PECH | 5        |
| S4         | GPC Report of POR-PECH                   | 6        |
| S5         | IR spectrum of POR-PECH & POR-GAP        | 7        |

|     |                                                                                                               |    |
|-----|---------------------------------------------------------------------------------------------------------------|----|
| S6  | <sup>1</sup> H NMR spectrum of POR-GAP                                                                        | 8  |
| S7  | <sup>13</sup> C NMR spectrum of POR-GAP                                                                       | 9  |
| S8  | GPC Report of POR-GAP                                                                                         | 10 |
| S9  | HR-TEM and FE-SEM Image of POR-GAP                                                                            | 11 |
| S10 | UV-Vis and Fluorescence spectra of POR-GAP                                                                    | 12 |
| S11 | Fluorescence spectra of POR-GAP with various concentration of mercuric ion                                    | 13 |
| S12 | Plot of fluorescence intensity vs mercuric ion concentration                                                  | 13 |
| S13 | Time-resolved fluorescence decay profile of POR-GAP                                                           | 14 |
| S14 | Selectivity Studies                                                                                           | 15 |
| S15 | Interference Studies                                                                                          | 15 |
| S16 | Optimized structures of POR-GAP                                                                               | 16 |
| S17 | DFT Molecular Orbitals of POR-GAP                                                                             | 17 |
| S18 | Cell viability study                                                                                          | 19 |
| S19 | FE- SEM & HR-TEM image of POR-GAP after addition of Hg <sup>2+</sup> ions                                     | 20 |
| S20 | Bright-field and fluorescence image of HeLa cells                                                             | 21 |
| S21 | Bright-field and fluorescence image of L6 cells                                                               | 26 |
| S22 | Graphical representation to show the difference in fluorescence intensity by the addition of Hg <sup>2+</sup> | 29 |

## S1. Synthesis of POR-GAP

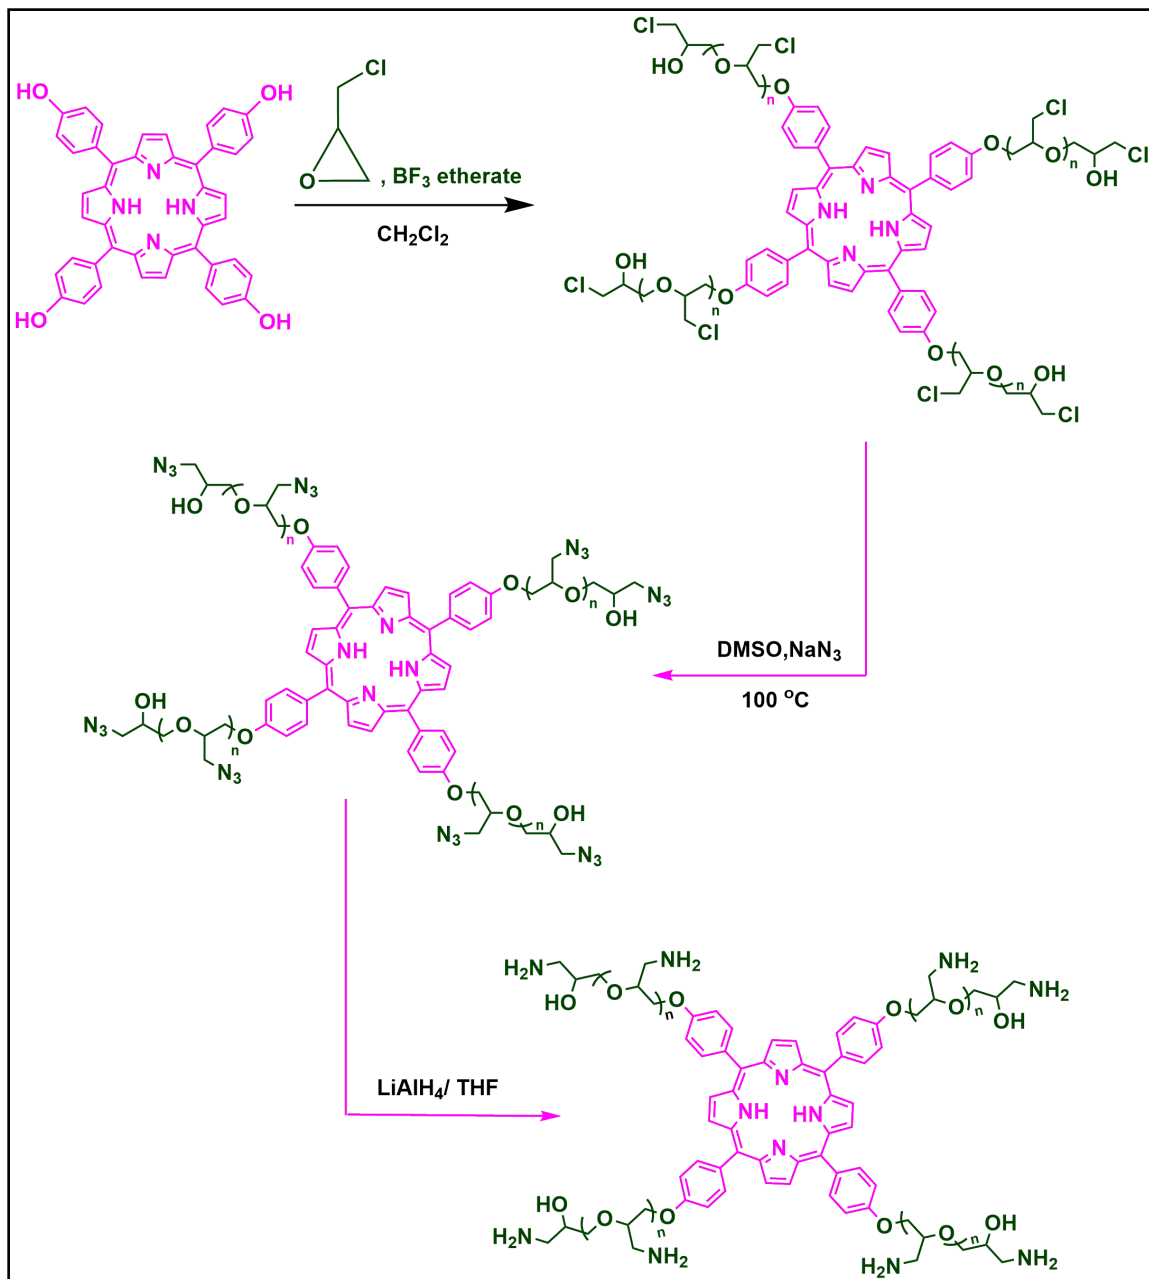

## S2. $^1\text{H}$ NMR spectrum of POR-PECH

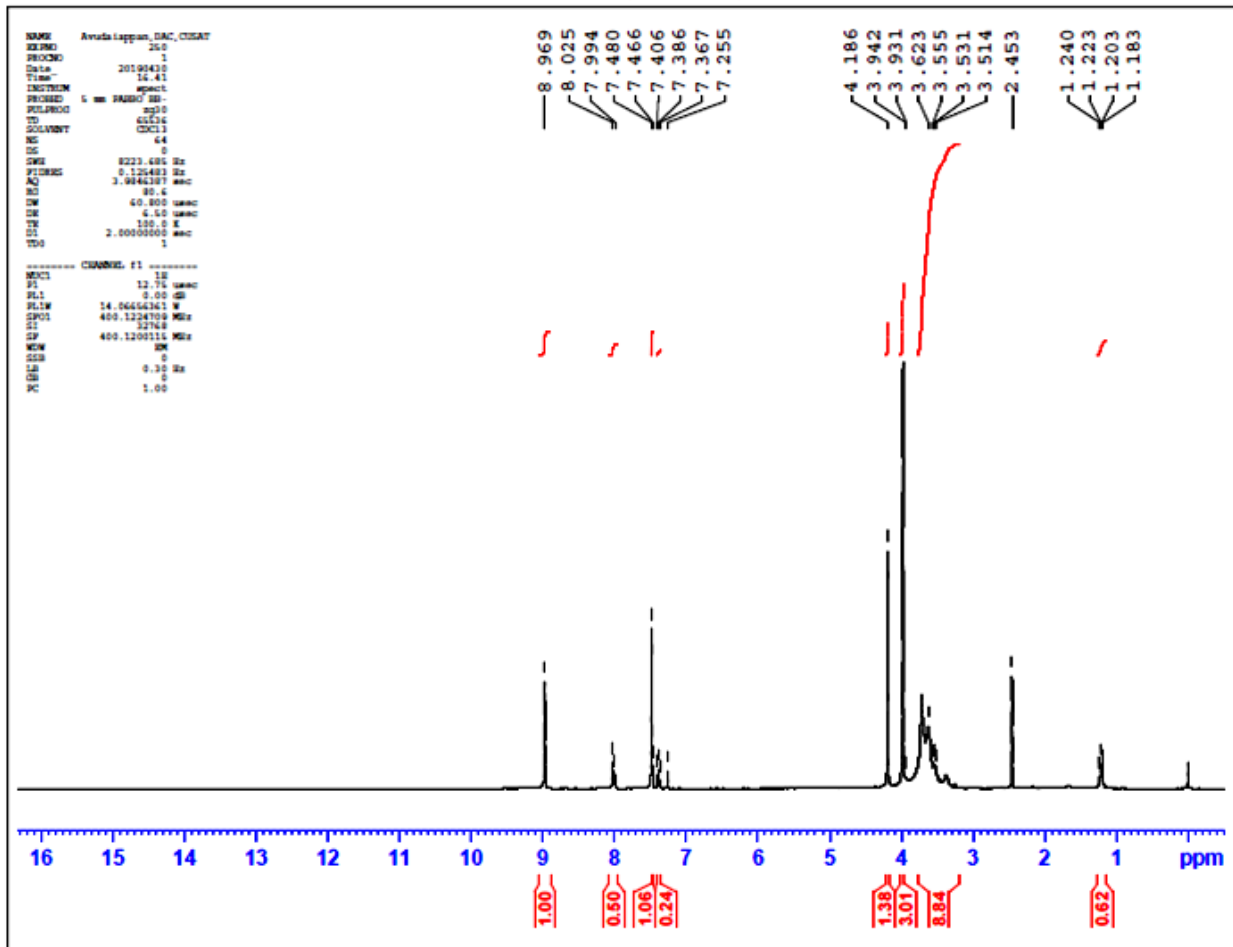

# S3. $^{13}\text{C}$ NMR spectrum of POR-PECH

SAIFNM190308C-05(POR-AZ)

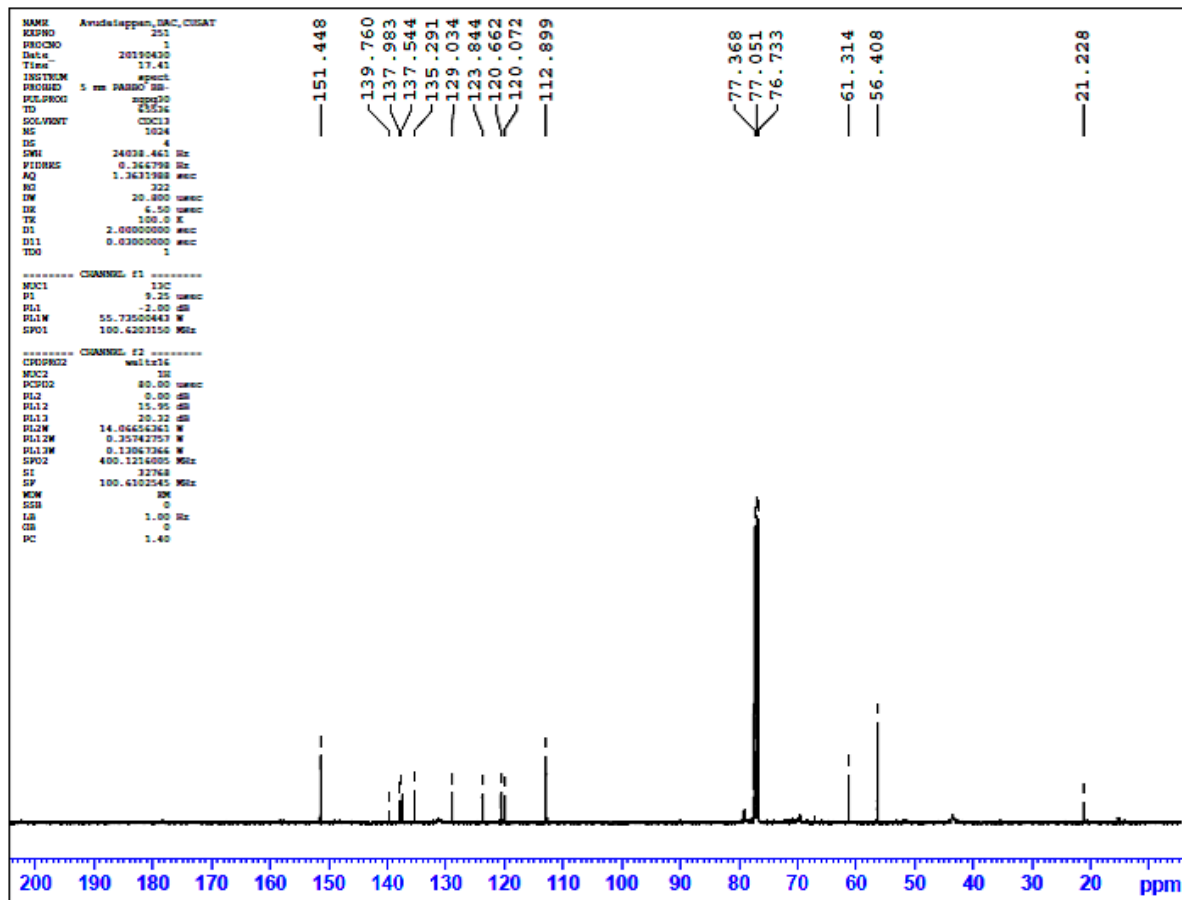

## S4. GPC Report of POR-PECH

### ==== Shimadzu LabSolutions GPC Analysis Report ====

Acquired by : System Administrator  
Sample Name : por-pech  
Sample ID : POR-PECH  
Tray# : 1  
Vial# : 42  
Injection Volume : 10 uL  
Data Filename : AVP1  
Method Filename : GPC Polystyrene 07022018 C.1cm  
Batch Filename : QUE.lcb  
Report Filename : DEFAULT.lsr  
Date Acquired : 3/5/2019 8:01:55 PM  
Date Processed : 7/2/2019 4:04:28 PM

Chromatogram & Calibration Curve

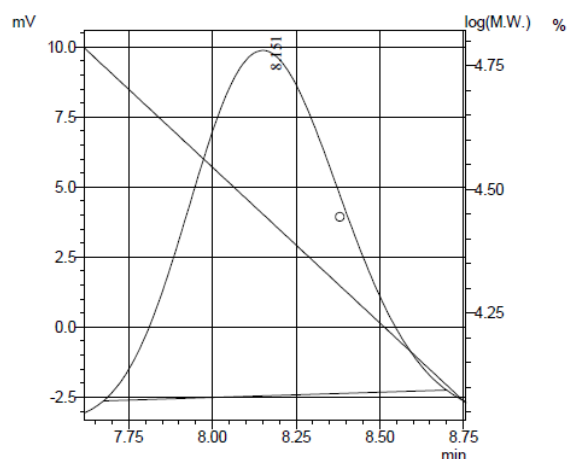

Molecular Weight Distribution Curve

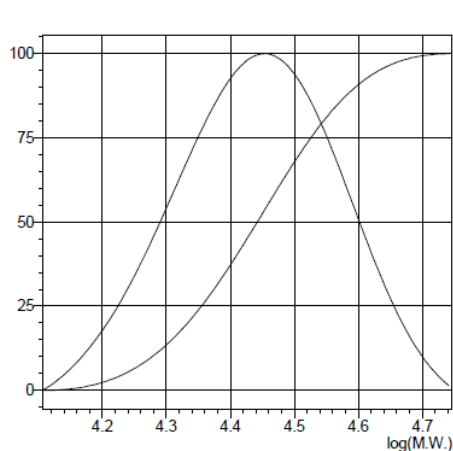

#### GPC Calculation Results

Peak#:1 (Detector B Channel 1)

[Peak Information]

|       | Time(min) | Volume(mL) | Molecular Weight | Height |
|-------|-----------|------------|------------------|--------|
| Start | 8.625     | 8.625      | 14173            | 7989   |
| Top   | 9.000     | 9.000      | 8236             | 1331   |
| End   | 9.250     | 9.250      | 5733             | 7618   |

Area : 24557

Area% : 100.0000

[Average Molecular Weight]

|                                     |         |
|-------------------------------------|---------|
| Number Average Molecular Weight(Mn) | 8288    |
| Weight Average Molecular Weight(Mw) | 8572    |
| Z Average Molecular Weight(Mz)      | 8885    |
| Z+1 Average Molecular Weight(Mz1)   | 9224    |
| Mw/Mn                               | 1.03423 |
| Mv/Mn                               | 0.00000 |
| Mz/Mw                               | 1.03655 |

Detector B Channel 1

[Average Molecular Weight(Total)]

|                                     |         |
|-------------------------------------|---------|
| Number Average Molecular Weight(Mn) | 8288    |
| Weight Average Molecular Weight(Mw) | 8572    |
| Z Average Molecular Weight(Mz)      | 8885    |
| Z+1 Average Molecular Weight(Mz1)   | 9224    |
| Mw/Mn                               | 1.03423 |
| Mv/Mn                               | 0.00000 |
| Mz/Mw                               | 1.03655 |

### S5. IR spectrum of POR-PECH & POR-GAP

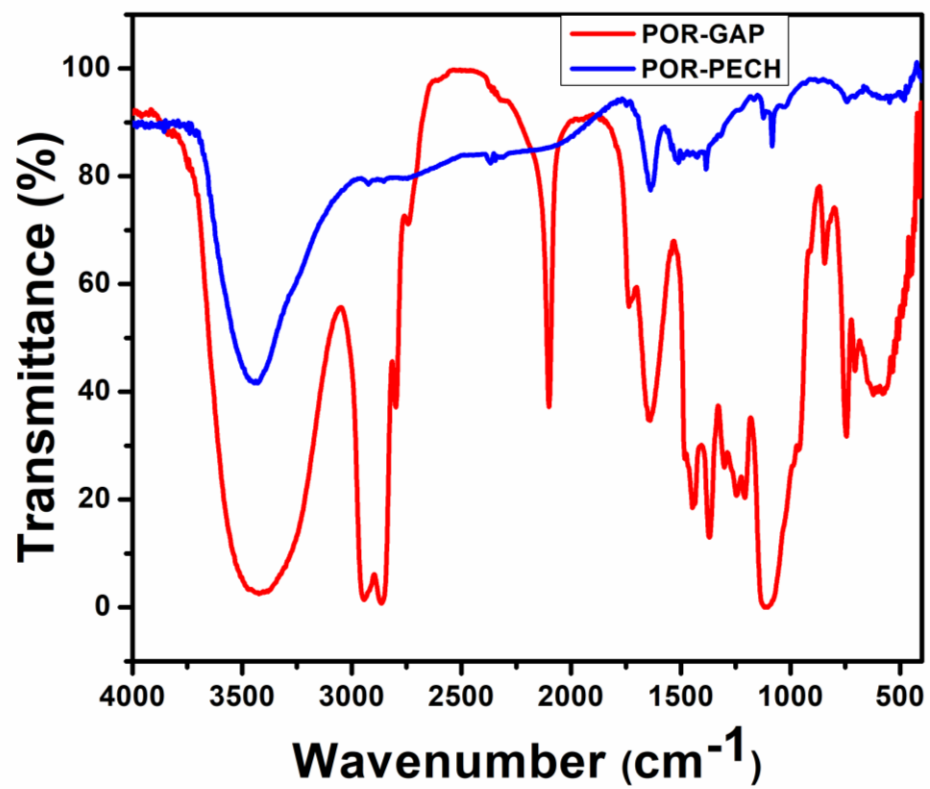

# S6. $^1\text{H}$ NMR spectrum of POR-GAP

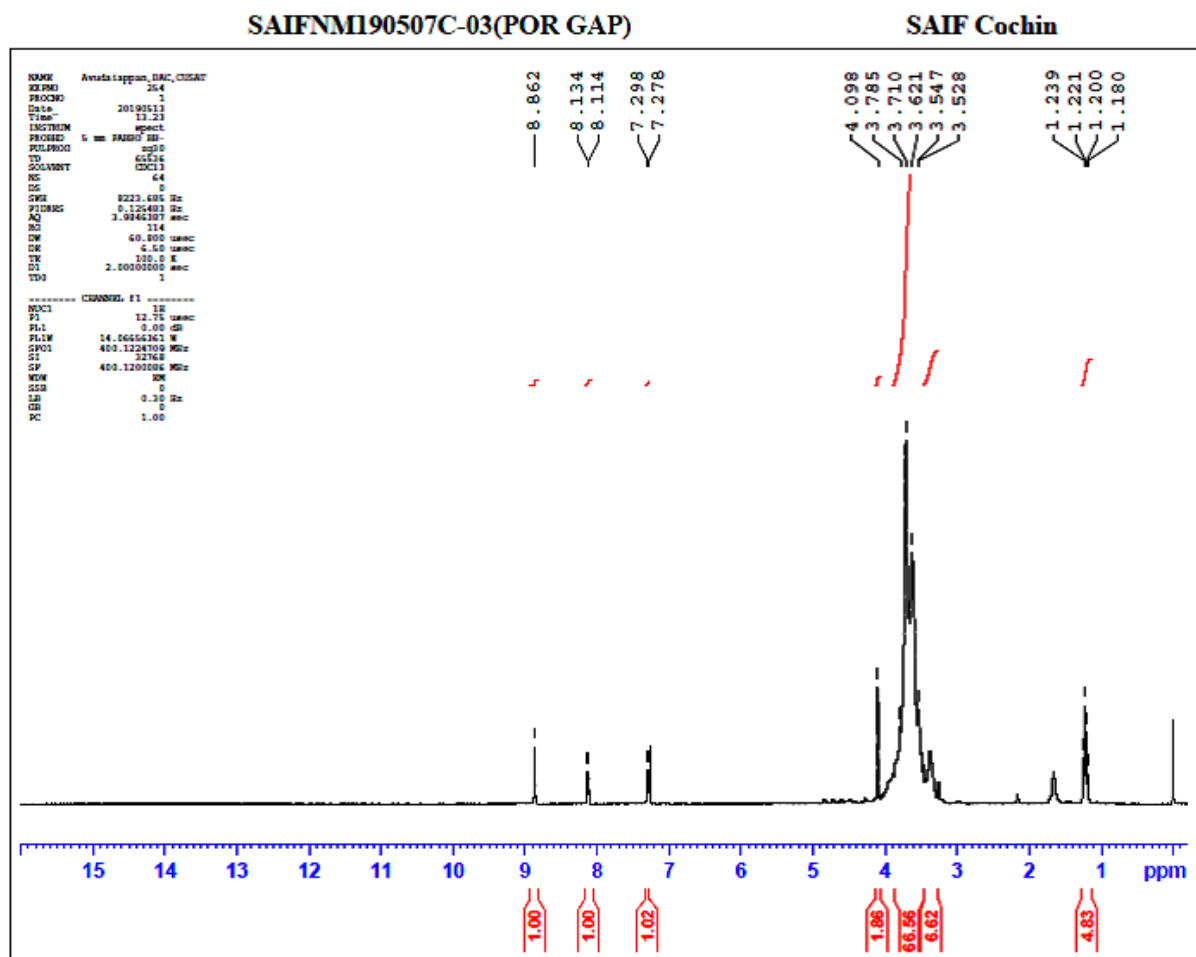



# S7. <sup>13</sup>C NMR spectrum of POR-GAP

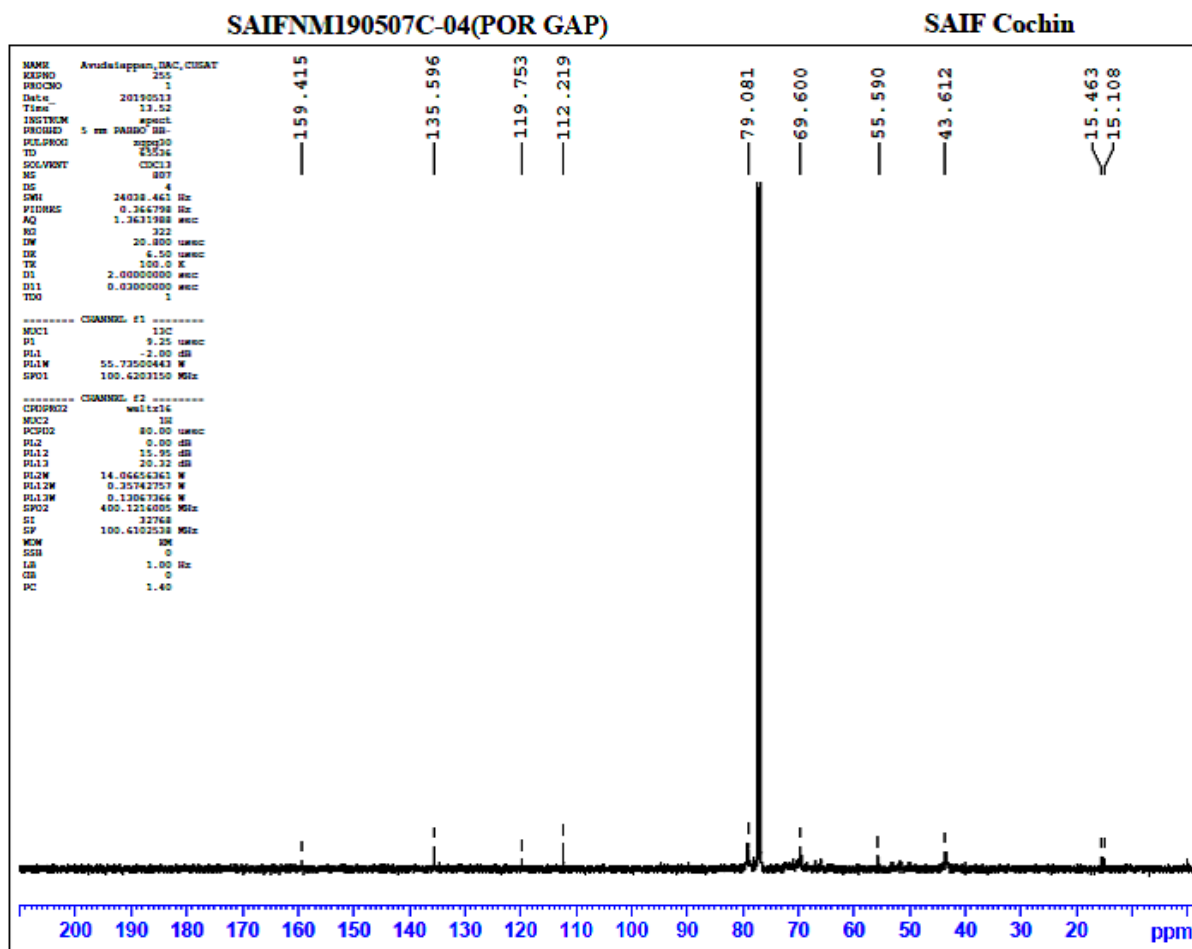

## S8. GPC Report of POR-GAP

### ==== Shimadzu LabSolutions GPC Analysis Report ====

Acquired by : System Administrator  
 Sample Name : AZI  
 Sample ID : AZI  
 Tray# : 1  
 Vial# : 44  
 Injection Volume : 10 uL  
 Data Filename : AZI.lcd  
 Method Filename : GPC Polystyrene 07022018 C.lcm  
 Batch Filename : QUE.lcb  
 Report Filename : DEFAULT.lsr  
 Date Acquired : 3/5/2019 8:32:36 PM  
 Date Processed : 7/2/2019 8:07:59 PM

#### Chromatogram & Calibration Curve

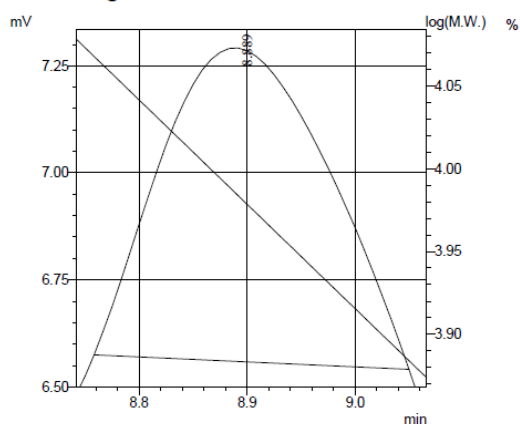

#### Molecular Weight Distribution Curve

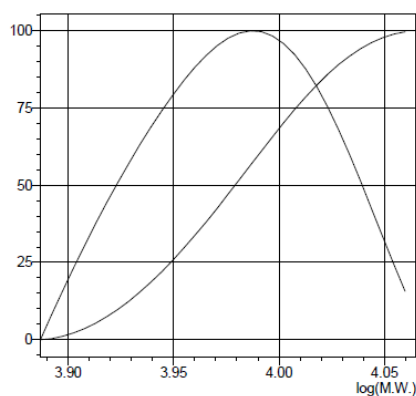

#### GPC Calculation Results

Peak#:1 (Detector B Channel 1)

[Peak Information]

|       | Time(min) | Volume(mL) | Molecular Weight | Height |
|-------|-----------|------------|------------------|--------|
| Start | 8.758     | 8.758      | 11685            | 6575   |
| Top   | 8.889     | 8.889      | 9672             | 732    |
| End   | 9.050     | 9.050      | 7659             | 6541   |

Area : 7843

Area% : 100.0000

[Average Molecular Weight]

|                                     |         |
|-------------------------------------|---------|
| Number Average Molecular Weight(Mn) | 9525    |
| Weight Average Molecular Weight(Mw) | 9603    |
| Z Average Molecular Weight(Mz)      | 9680    |
| Z+1 Average Molecular Weight(Mz1)   | 9757    |
| Mw/Mn                               | 1.00817 |
| Mv/Mn                               | 0.00000 |
| Mz/Mw                               | 1.00808 |

Detector B Channel 1

[Average Molecular Weight(Total)]

|                                     |         |
|-------------------------------------|---------|
| Number Average Molecular Weight(Mn) | 9525    |
| Weight Average Molecular Weight(Mw) | 9603    |
| Z Average Molecular Weight(Mz)      | 9680    |
| Z+1 Average Molecular Weight(Mz1)   | 9757    |
| Mw/Mn                               | 1.00817 |
| Mv/Mn                               | 0.00000 |
| Mz/Mw                               | 1.00808 |

### **S9. HR-TEM and FE-SEM Images of POR-GAP**

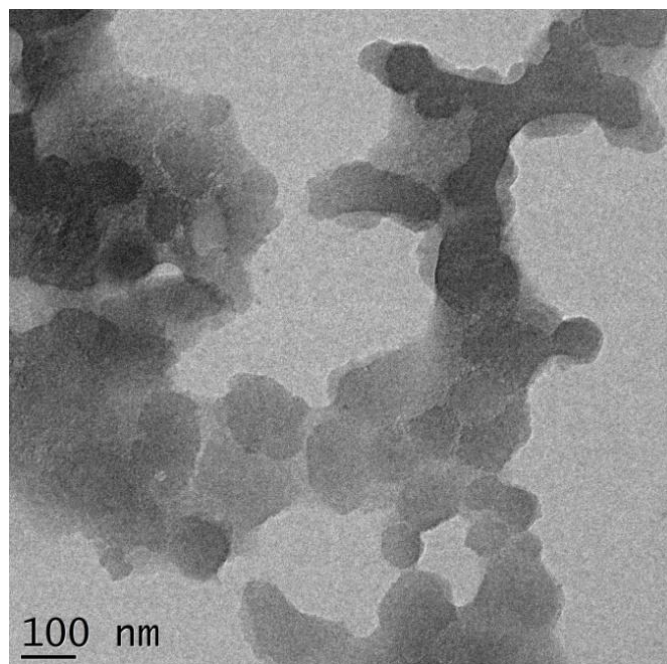

**FE-SEM Image of POR-GAP**

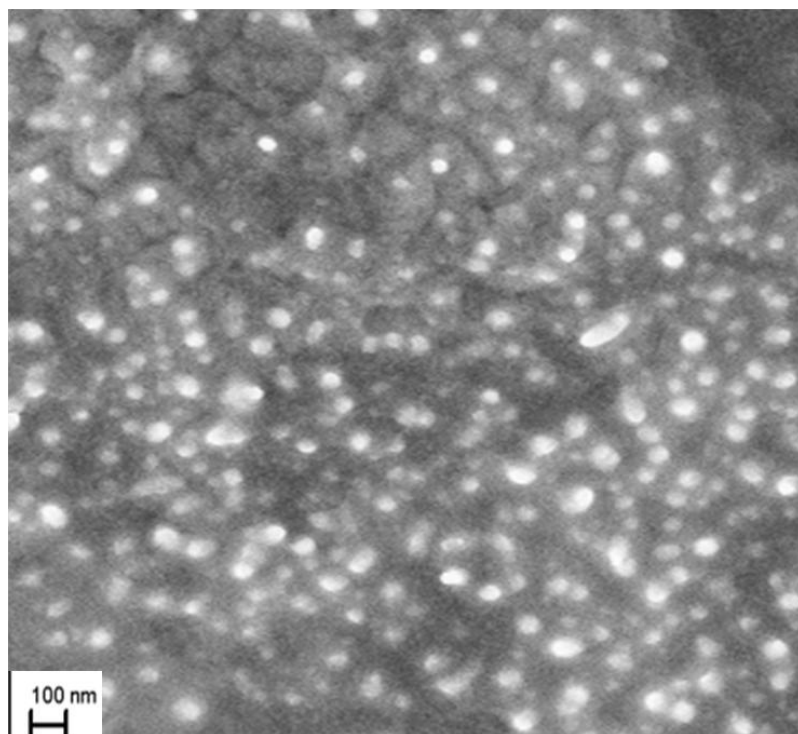

### S10. UV-Vis and Fluorescence spectra of POR-GAP

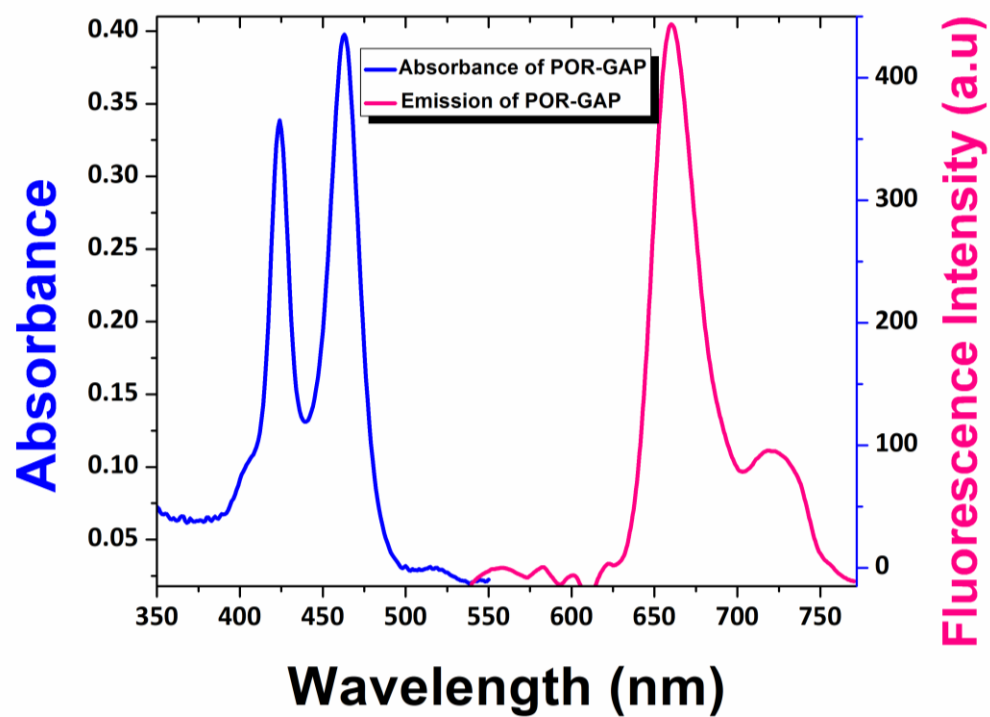

**S11. Fluorescence spectra of POR-GAP with various concentration of mercuric ion**

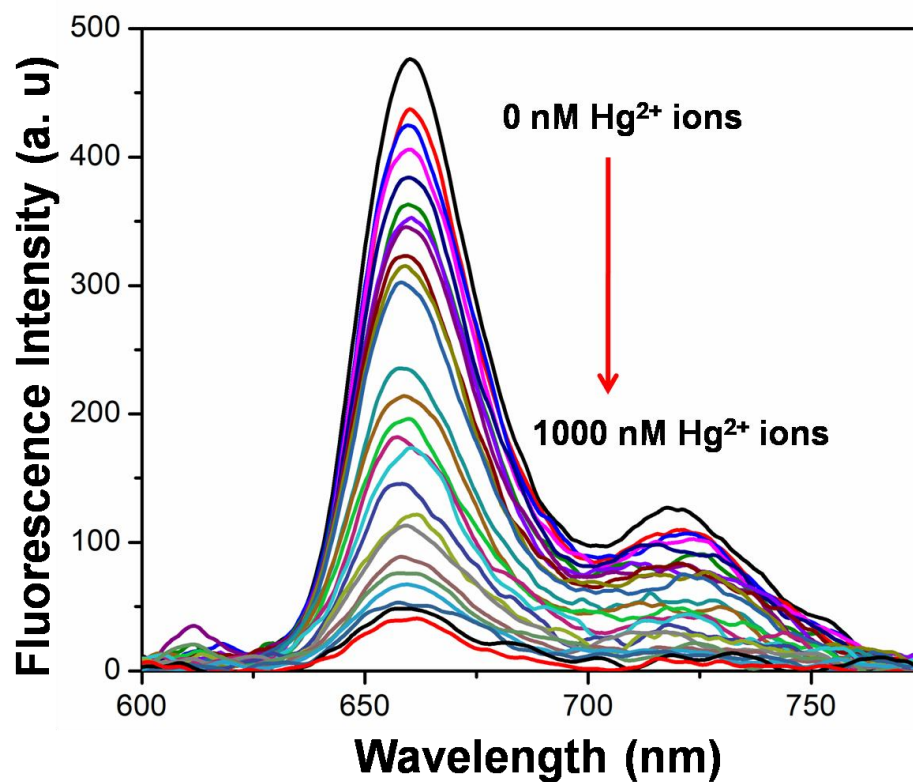

**S12. Plot of ratio of fluorescence intensity against mercuric ion concentration**

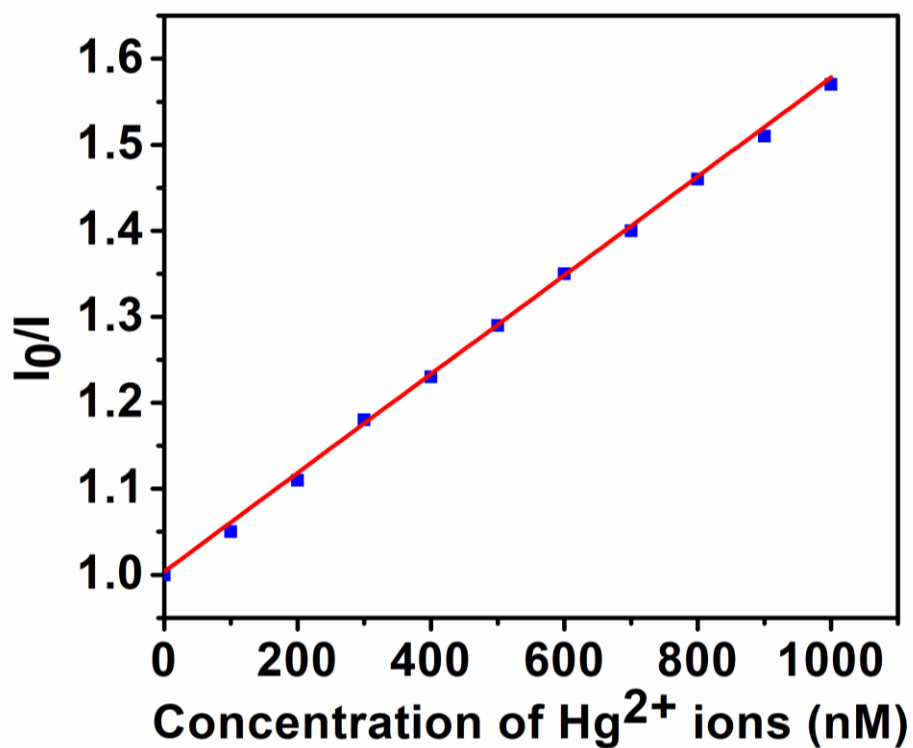

**S13. Time-resolved fluorescence decay profile of POR-GAP**

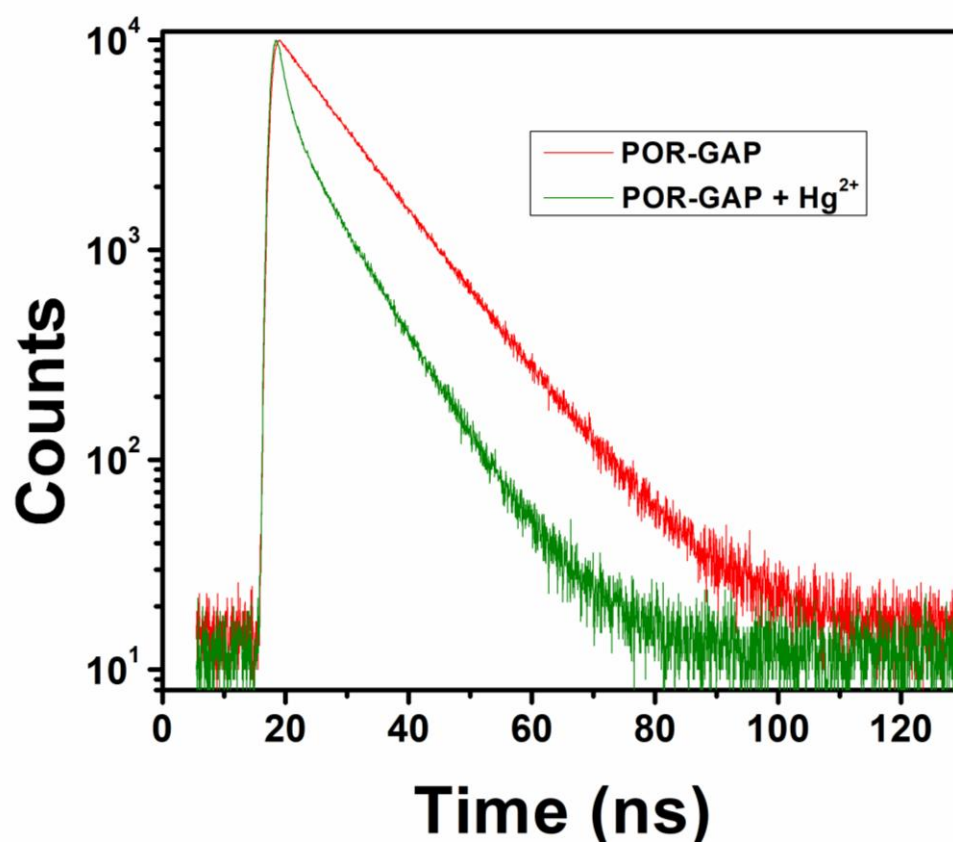

S14. Fluorescence intensity of POR-GAP with 50 equiv. of various cations.

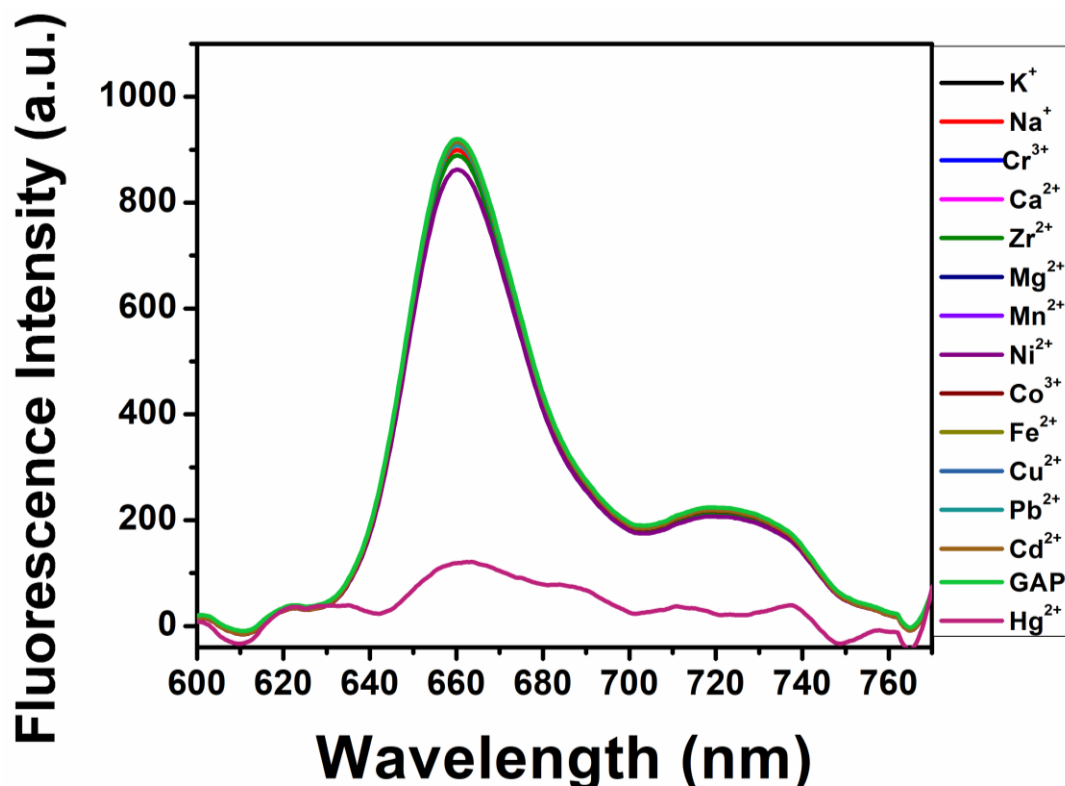

S15. Fluorescence intensity response of POR-GAP in the presence of 50 equiv. of various cations with mercuric ion

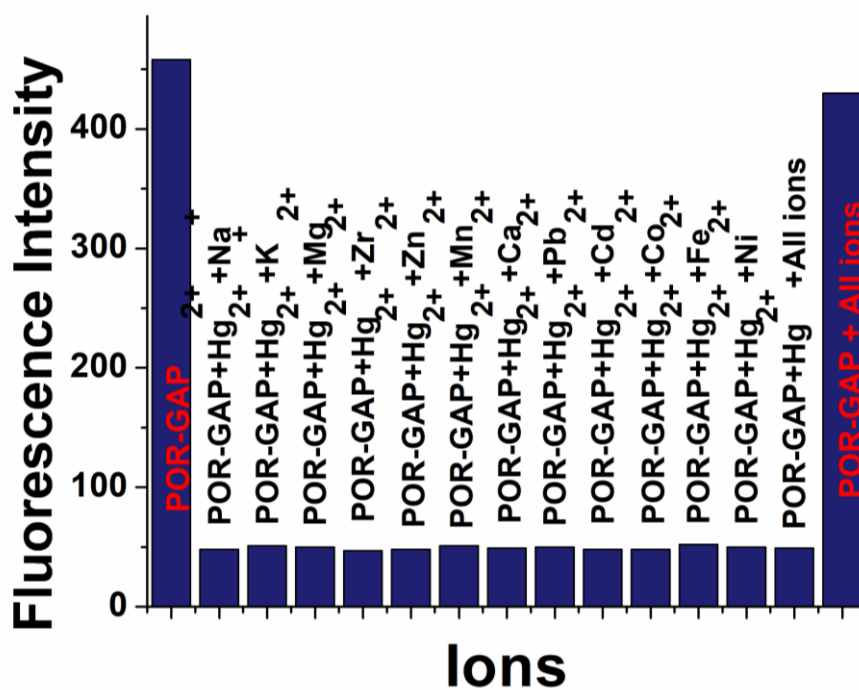

### S16. Optimised structures of POR-GAP

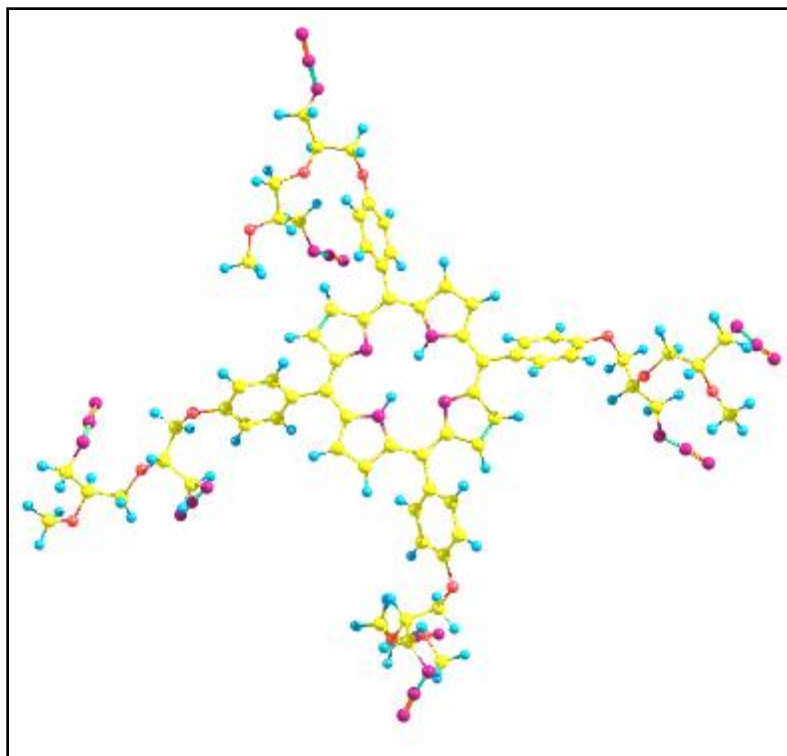

### Optimised structures of POR-GAP after addition of $\text{Hg}^{2+}$

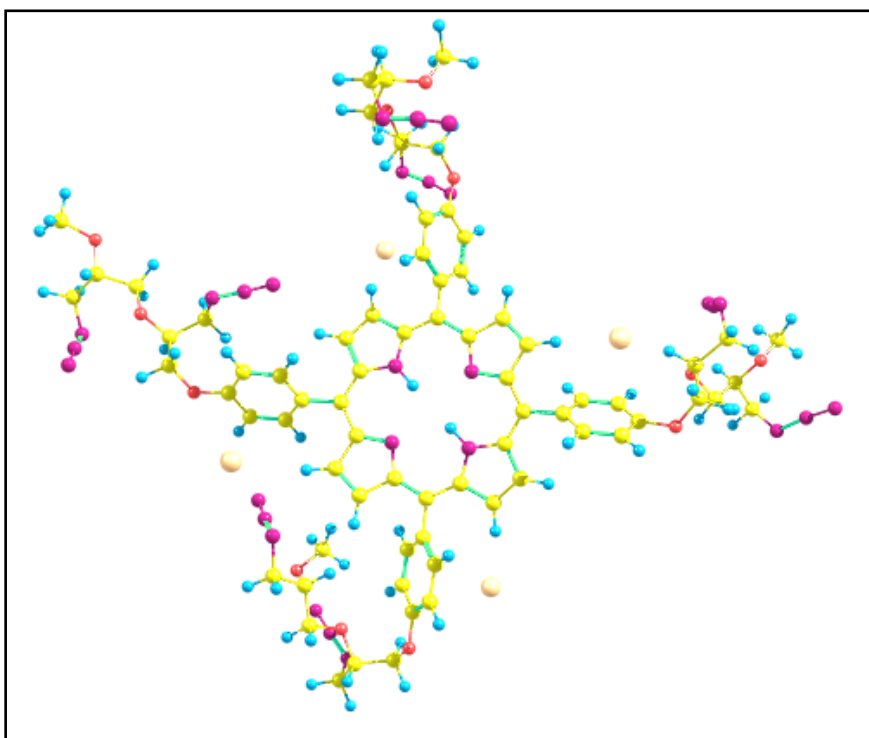



## S17. DFT Molecular Orbitals of POR-GAP

HOMO

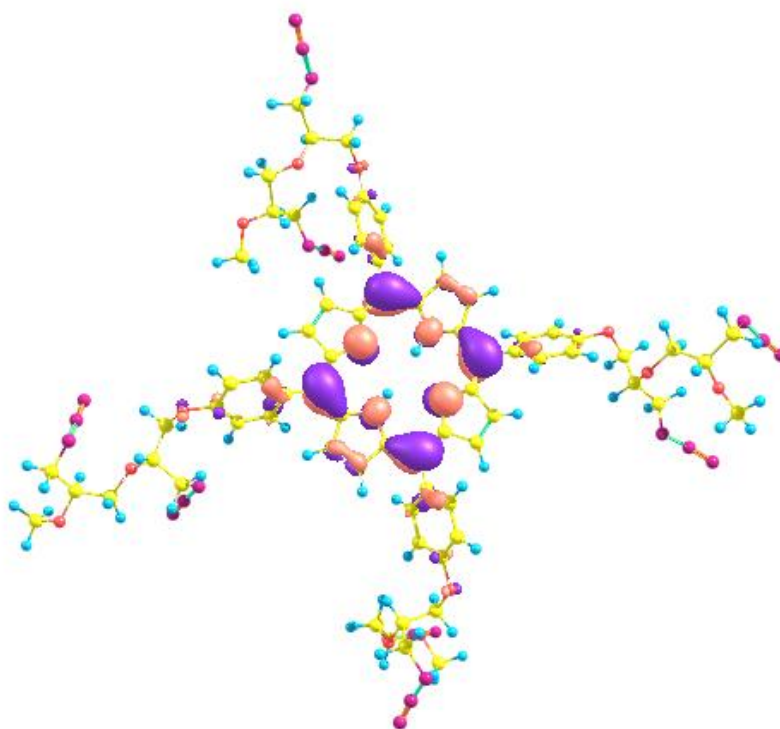

LUMO

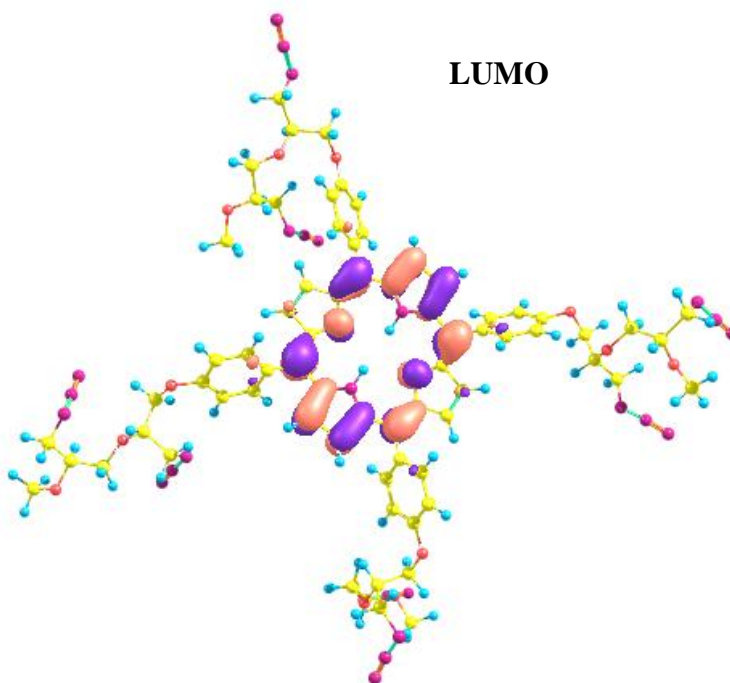

**DFT Molecular Orbitals of POR-GAP after addition of  $\text{Hg}^{2+}$  ion**

**HOMO**

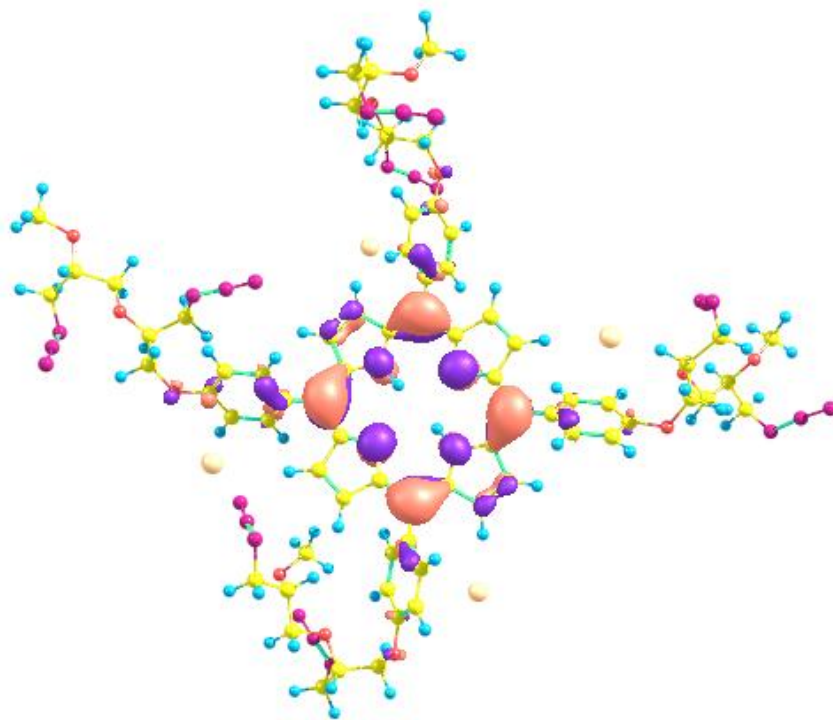

**LUMO**

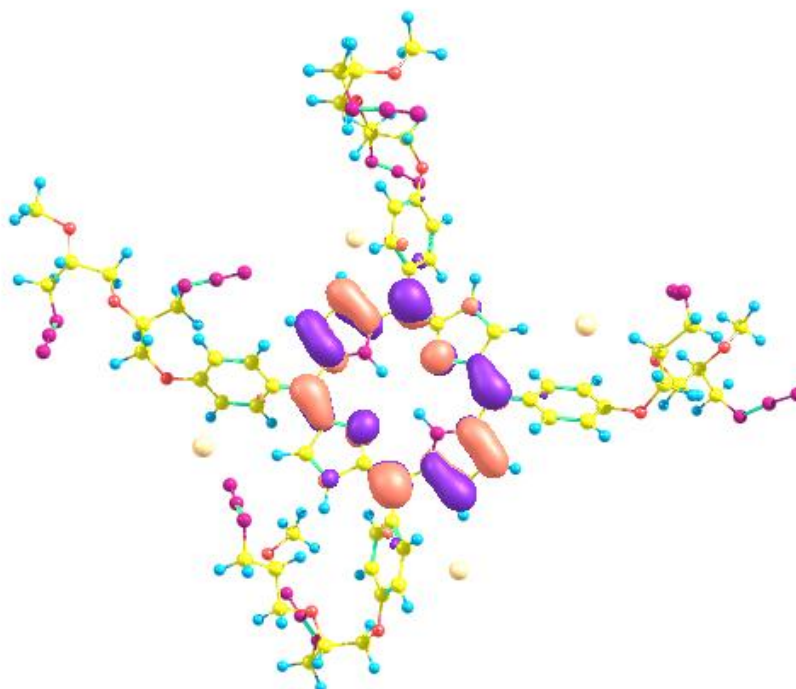

### S18. Cell-viability study

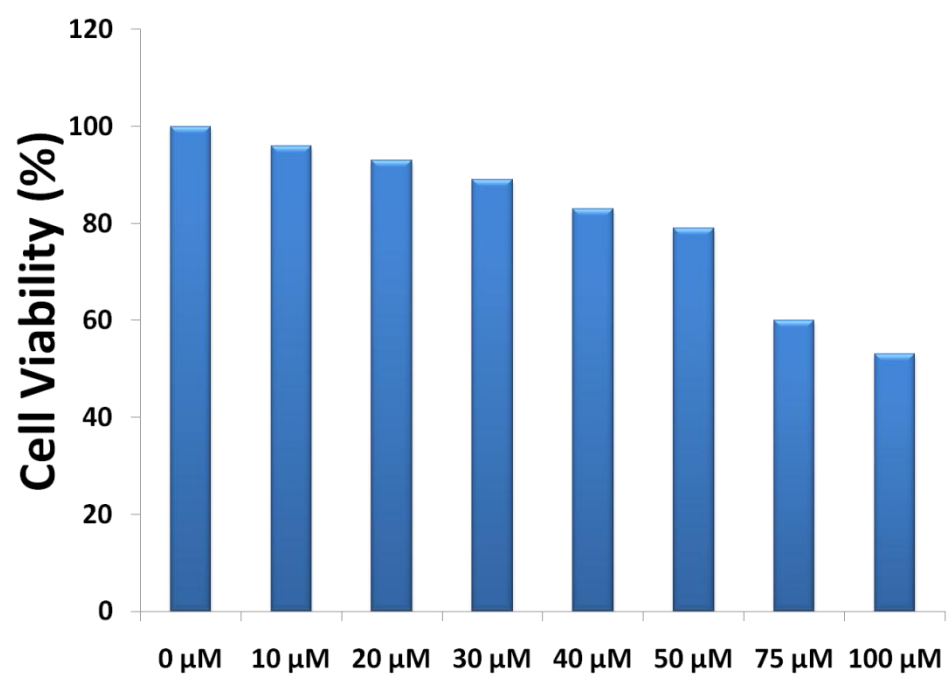

**S19. FE- SEM & HR-TEM image of POR-GAP after addition of  $\text{Hg}^{2+}$  ion**

**FE-SEM Image**

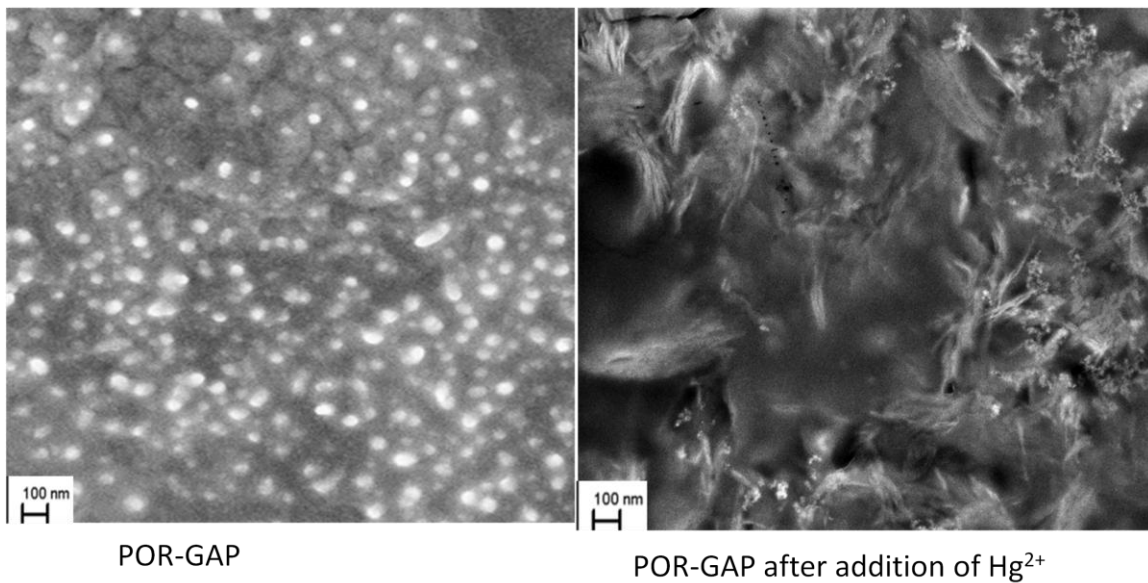

**HR-TEM Image**

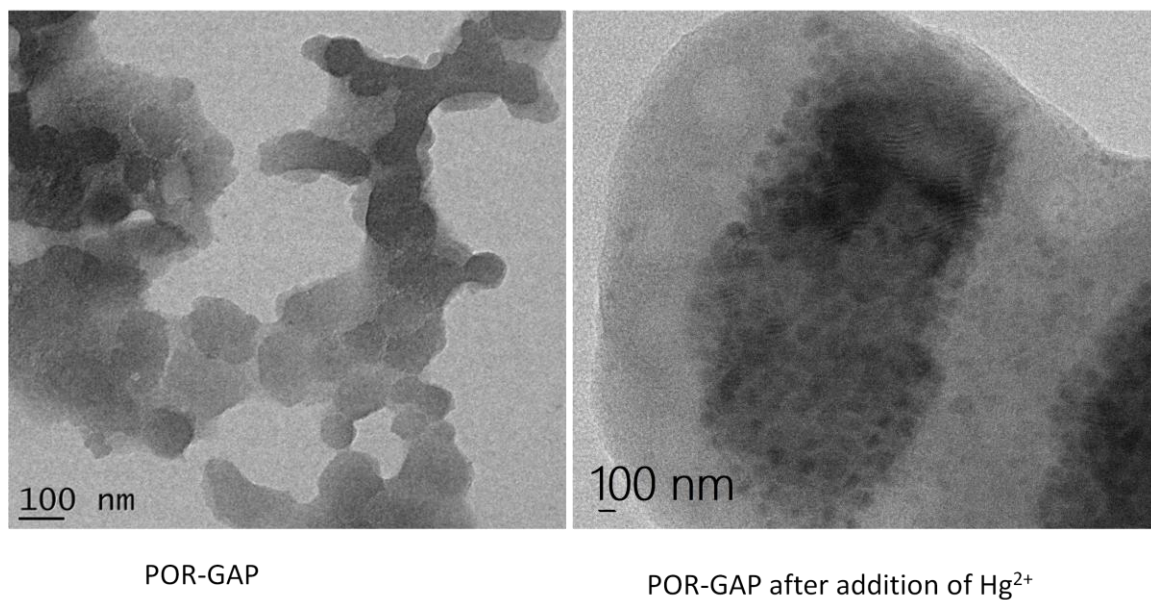

**S20. A) Bright-field image of HeLa cells incubated with POR-GAP.**

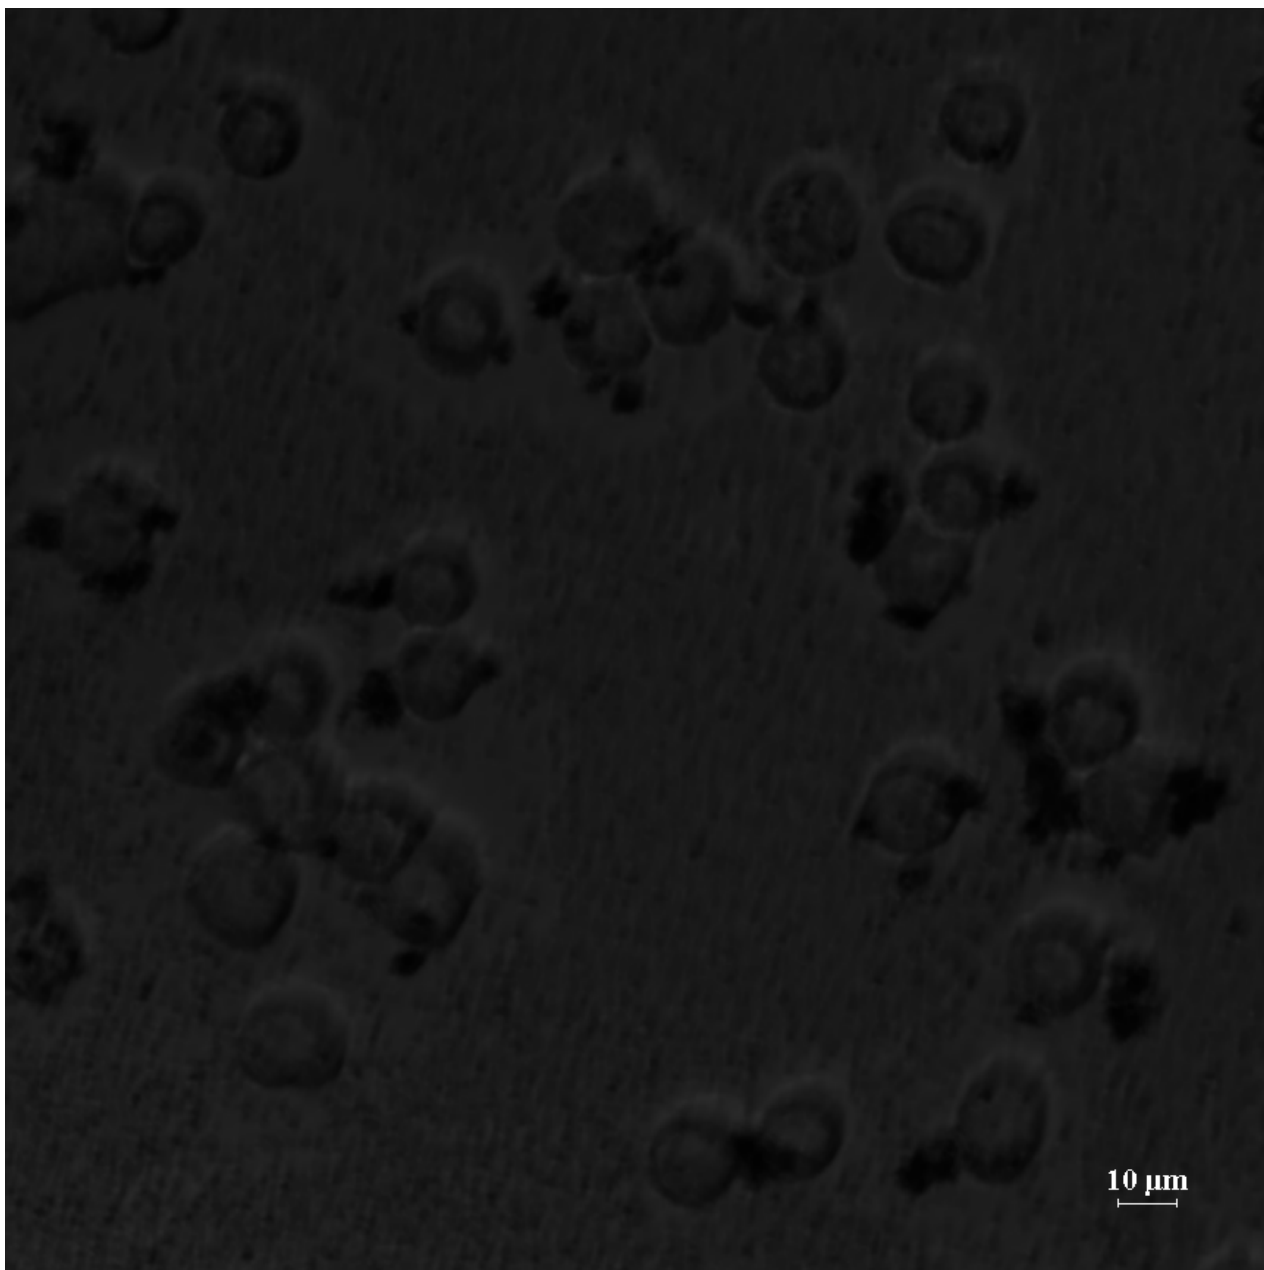



**S20. B) Fluorescence image of HeLa cells incubated with POR-GAP.**

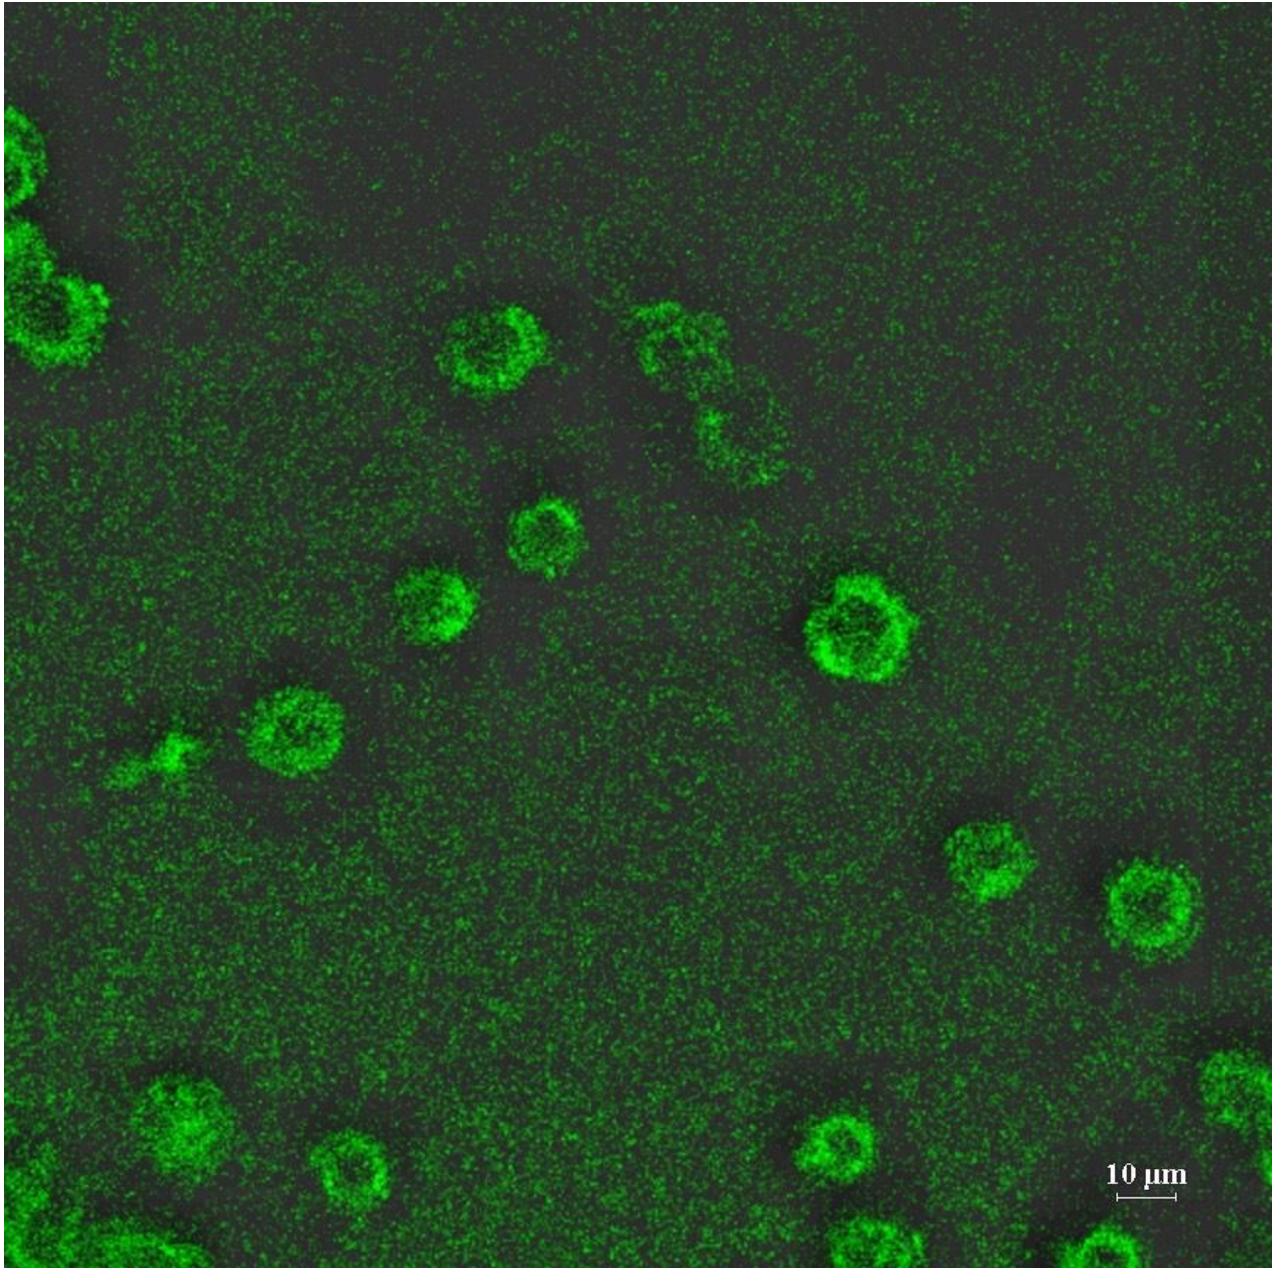

**S20. C) Merged image of fluorescence and bright-field images**

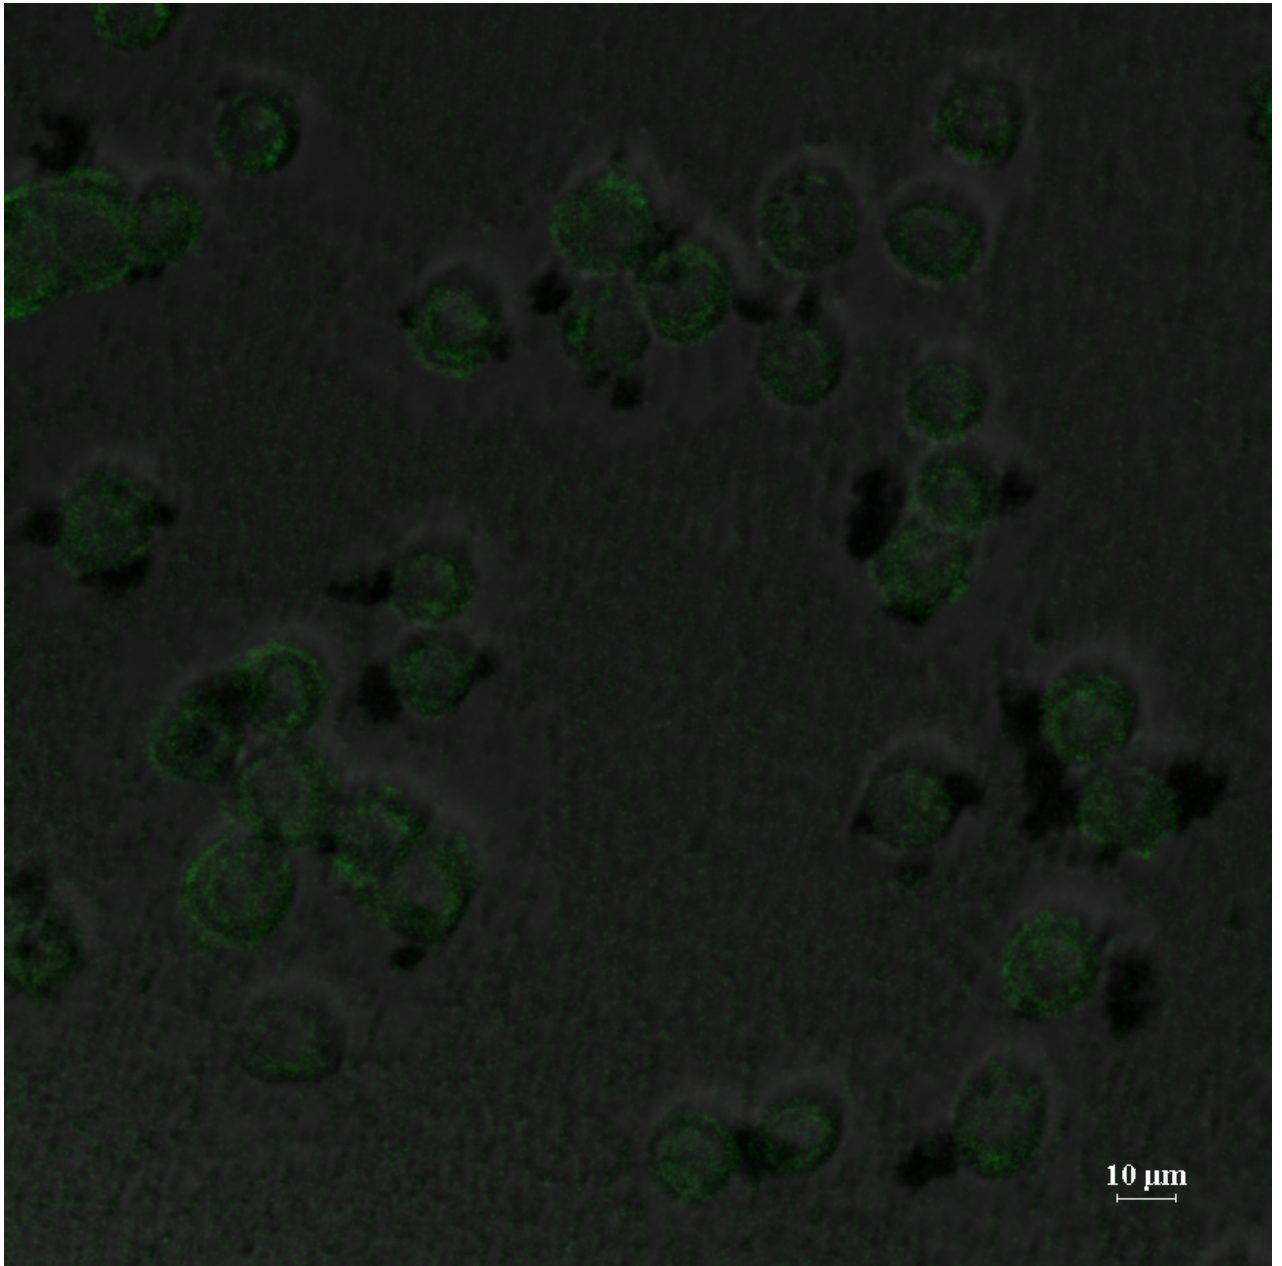

**S20. D) Bright-field image of HeLa cells pre-treated with  $\text{Hg}^{2+}$  ion and incubated with POR-GAP.**

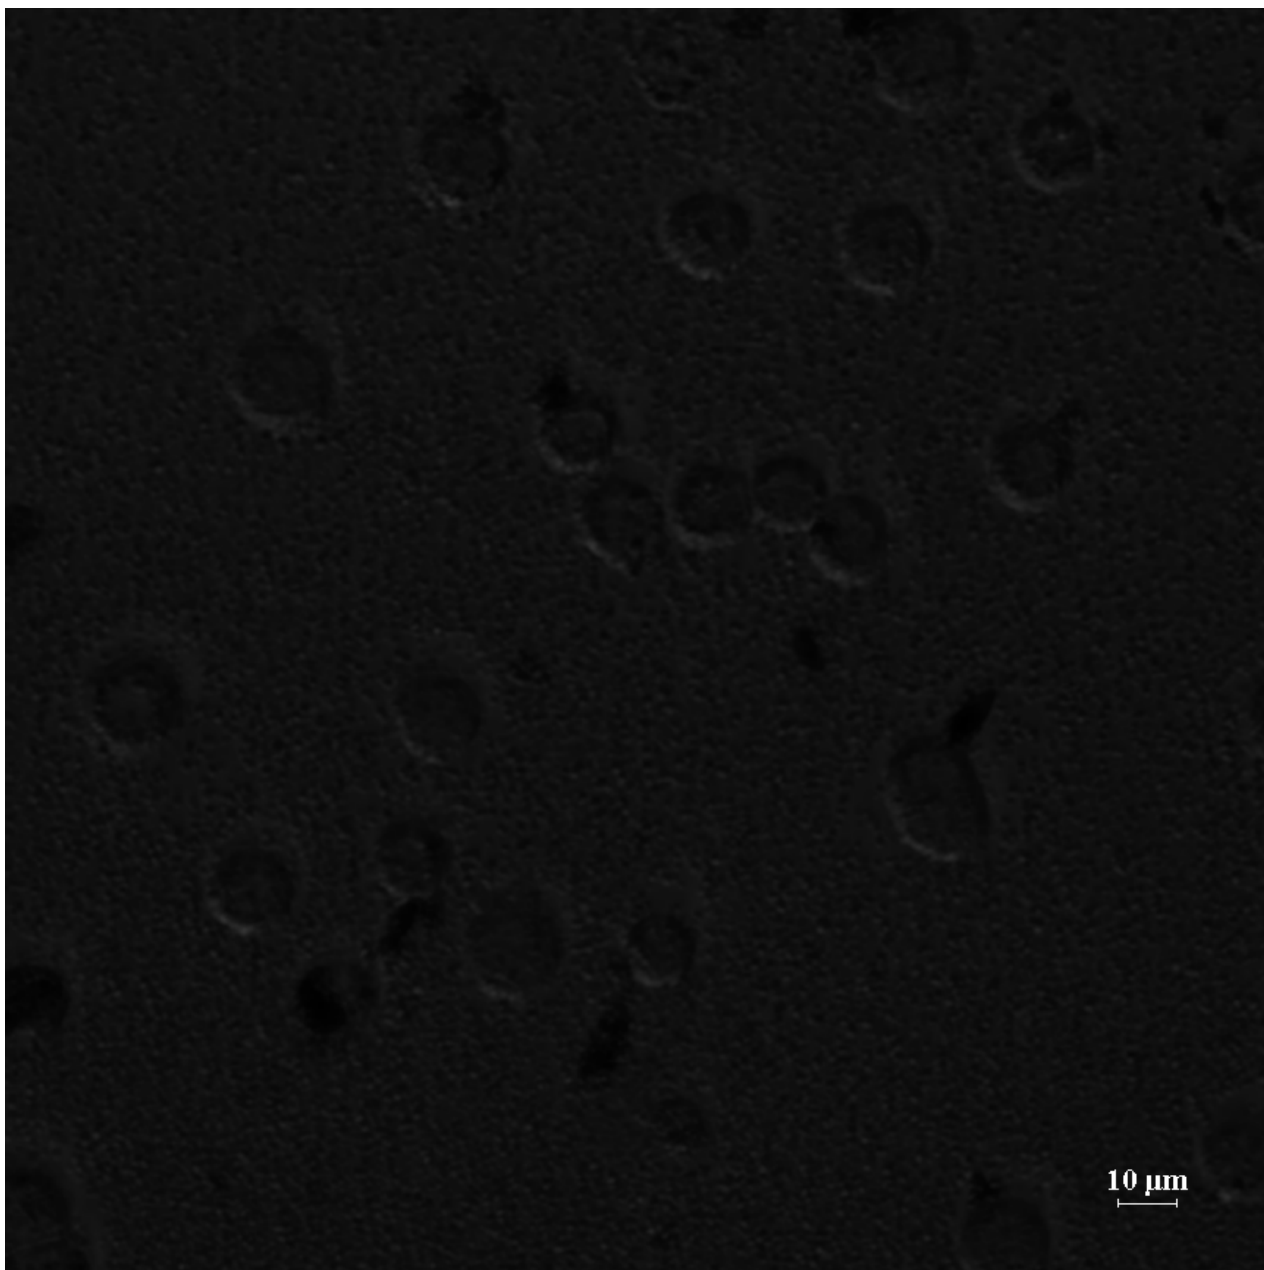



**S20. E) Fluorescence image of HeLa cells pre-treated with Hg<sup>2+</sup> ion and incubated with POR-GAP.**

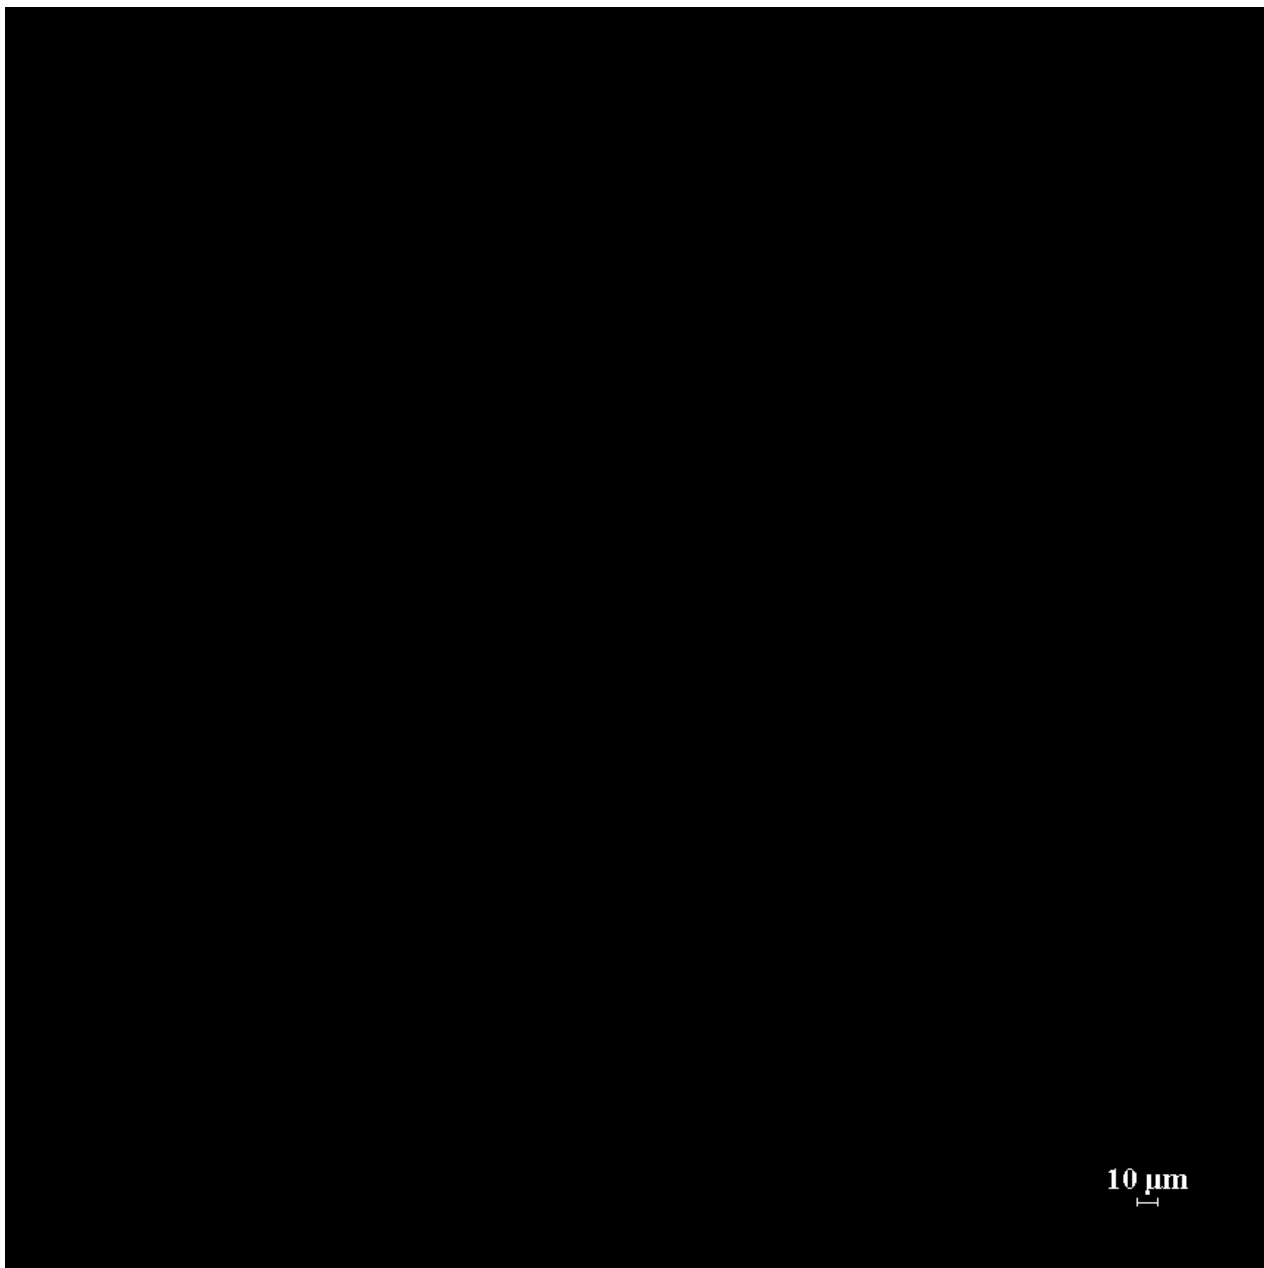

**S21. Bright-field and fluorescence images of L6 cells**

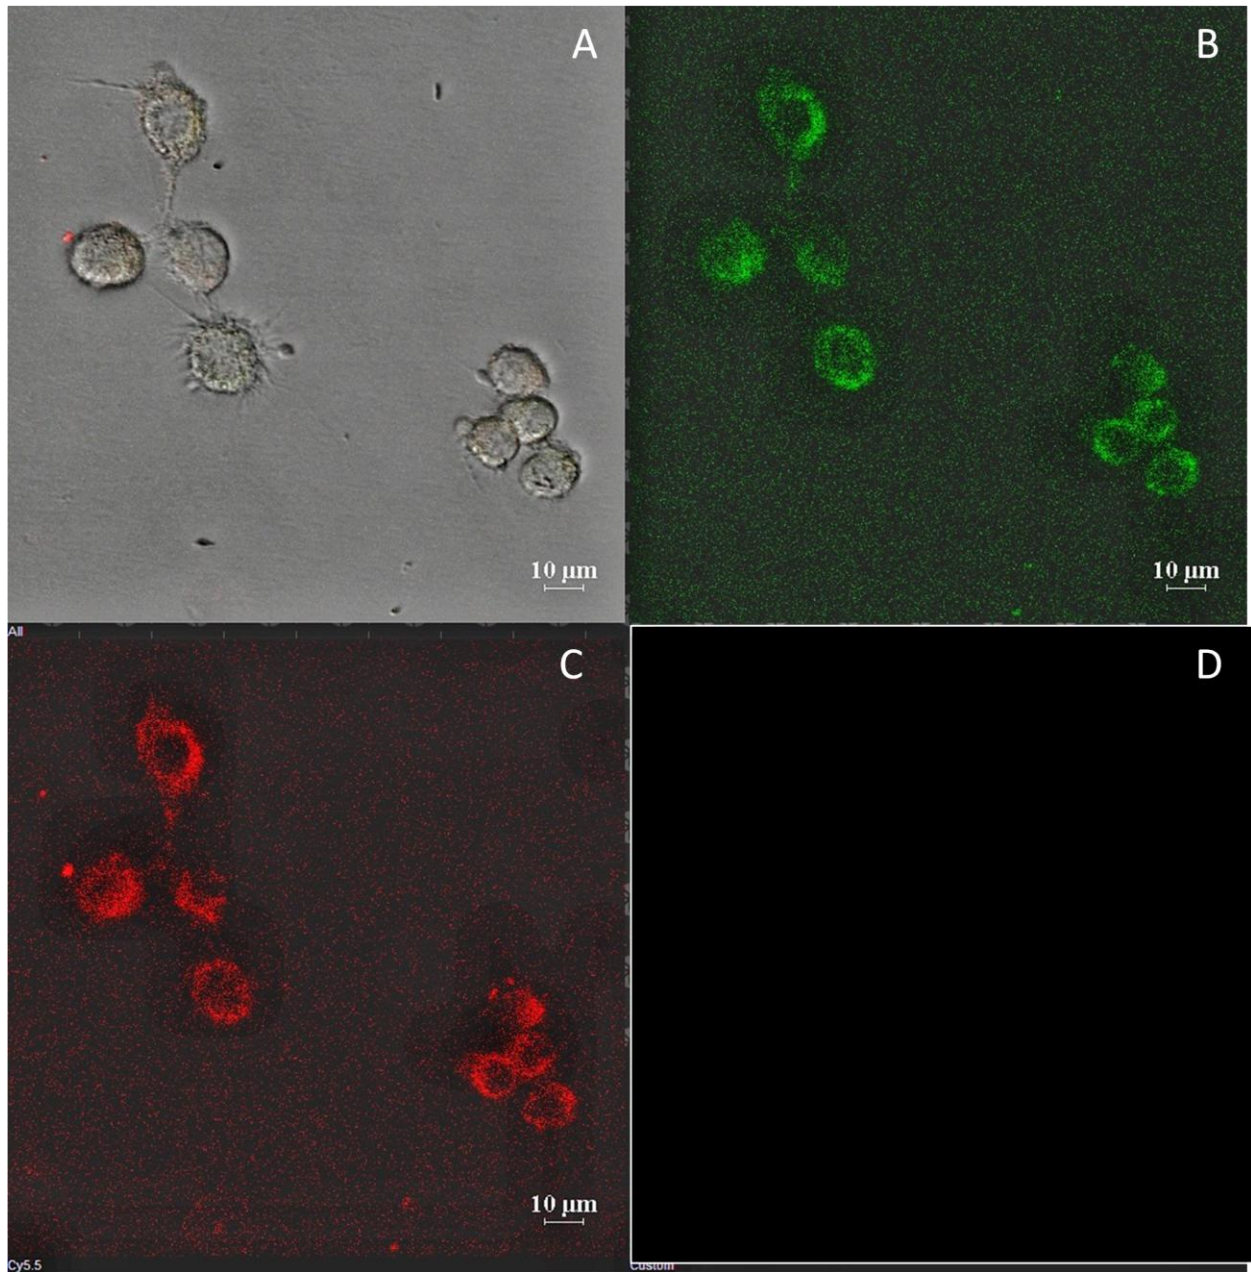

**S21. H, K) Bright-field & Fluorescence images of L6 cells pre-treated with  $\text{Hg}^{2+}$  ion and incubated with POR-GAP**

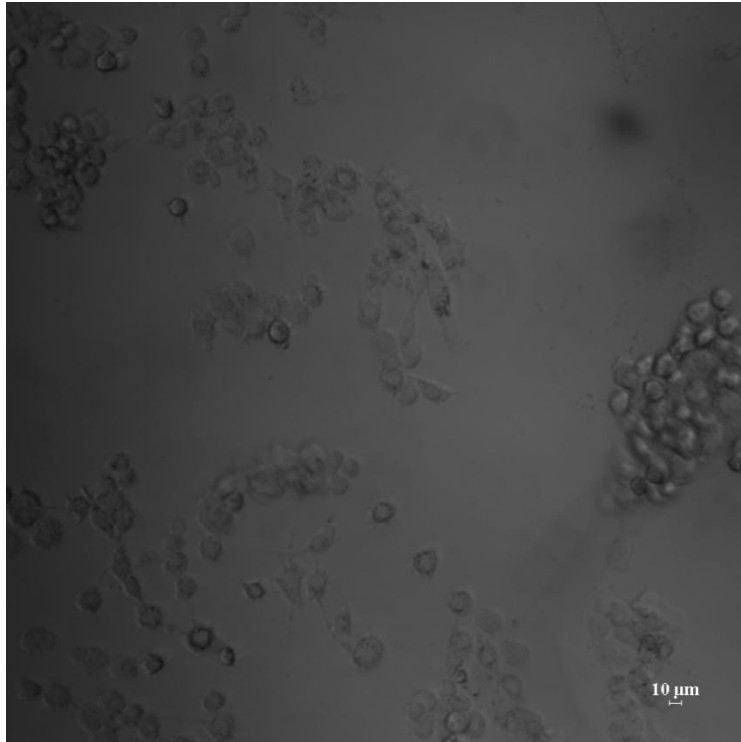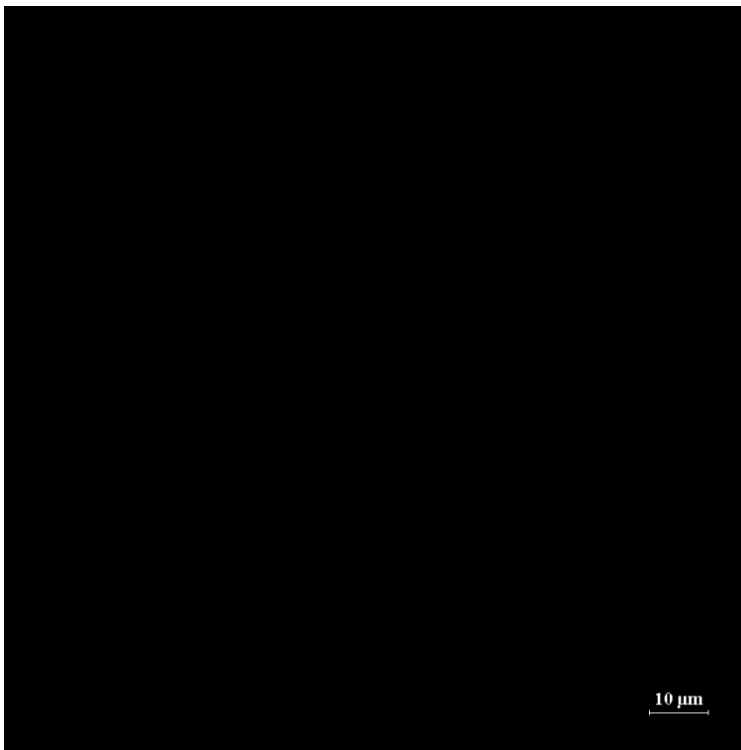

**S22. Graphical representation to show the difference in fluorescence intensity by the addition of  $\text{Hg}^{2+}$ .**

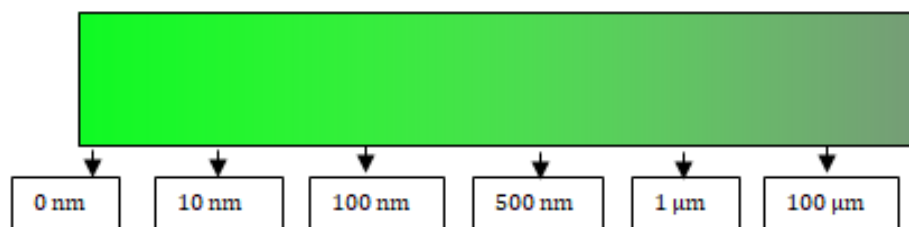

Supplement: d0ay00769b1.pdf [file d0ay00769b1.pdf]
